# Supplementary material for: White-matter functional network dysfunction associated with cognitive deficits and clinical phenotypes in patients with end-stage renal disease
Source: Research Square preprint supplement (doi:10.21203/rs.3.rs-7702413/v1), 2025-10-30
Supplement: Supplementary file 1 [file bcc51b9c99c0f0afd4aae57b.pdf]

**White-matter functional network dysfunction associated with cognitive deficits and  
clinical phenotypes in patients with end-stage renal disease**

**Supplementary Materials**

Peng Li<sup>#1,2,3</sup>; Yu-Xuan Shang<sup>#3</sup>; Jun-Ya Mu<sup>1</sup>; Xin-Yi Zhu<sup>1</sup>; Zhao-Yao Luo<sup>1</sup>; Qian-Ge Zhu<sup>1</sup>;  
Hui-Jie Yuan<sup>1</sup>; Ting Ge<sup>3</sup>; Chen-Xi Wang<sup>3</sup>; Wen Wang<sup>\*3</sup>; Ming Zhang<sup>\*1</sup>

1 Department of Medical Imaging, First Affiliated Hospital of Xi'an Jiaotong University, No.  
277, West Yanta Road, Xi'an, 710061, Shaanxi, China.

2 Department of Medical Imaging, Nuclear Industry 215 Hospital of Shaanxi Province, West  
Weiyang Road, Xianyang, 712000, Shaanxi, China.

3 Department of Radiology & Functional and Molecular Imaging Key Lab of Shaanxi  
Province, Tangdu Hospital, Fourth Military Medical University, 569 Xinsi Road, Xi'an  
710038, Shaanxi, China.

## **Supplementary Methods**

### ***MRI data acquisition***

The T1-FLAIR was scanned before the rs-fMRI protocol to adapt to the MR environment and exclude intracranial lesions (echo time/repetition time = 24/1750 ms, matrix =  $256 \times 256$ , flip angle =  $111^\circ$ , inversion time = 780 ms, slice thickness = 6 mm, slice gap = 0.6 mm). The T1-weighted structural data were obtained with a three-dimensional brain volume imaging sequence (echo time/repetition time = 3.2/8.2, flip angle =  $15^\circ$ , matrix =  $256 \times 256$ , slice thickness = 1 mm, slice gap = 0 mm, slices number = 140). The rs-fMRI data were collected with an echo-planar imaging sequence (TE/TR = 50/2000 ms, matrix =  $64 \times 64$ , FA =  $90^\circ$ , field-of-view FOV =  $240 \times 240 \text{ mm}^2$ , slice thickness = 4 mm, slice gap = 0 mm, slices = 45, voxel size =  $3 \times 3 \times 3 \text{ mm}^3$ ). Each rs-fMRI acquisition lasted for 6 min 10 s and included 185 functional volumes.

### ***FC and FCC of WM networks***

It is important to emphasize that the FCC and FC of WM functional networks are complementary and contribute to the interpretation of rs-fMRI studies. FC refers to the correlation between BOLD signals from two regions, so it can only reflect information from two limited regions (i.e., one-to-one information flow). In contrast, by integrating information from multiple regions, the FCC carries complex information interactions (i.e., one-to-many-to-one information flow). The FC strength between WM functional networks reflects their inherent interactions, while the FCC strength balances the influence of gray matter on WM functional networks<sup>1,2</sup>. Therefore, in this study, we use both FC and FCC to characterize the relationships between WM functional networks.

## Supplementary Results

### *Between-group differences of the FC in WM functional networks*

Compared with HCs, ESRD patients exhibited widespread reductions in FC among 11 WM functional networks (Figure 3a and Supplementary Table 2,  $p < 0.05$ , FDR corrected), including between corona radiata network and frontal, middle temporal, orbitofrontal, cerebellar, frontoparietal, and deep networks; between frontal network and middle temporal, orbitofrontal, occipital, cerebellar, frontoparietal, and deep networks; between pre/post-central network and middle temporal, cerebellar, occipital, frontoparietal, and deep networks; between middle temporal network and orbitofrontal, frontoparietal, and deep networks; between cerebellar network and orbitofrontal, frontoparietal, and deep networks; between occipital network and frontoparietal network; between orbitofrontal network and frontoparietal network; and between deep network and frontoparietal, middle temporal, cerebellar, and orbitofrontal networks.

### *Between-group differences of the FCC in WM functional networks*

Compared with HCs, ESRD patients exhibited widespread reductions in FCC among WM functional networks (Figure 3b and Supplementary Table 3,  $p < 0.05$ , FDR corrected), including reduced FCC between corona radiata network and frontal, middle temporal, orbitofrontal, cerebellar, frontoparietal, and deep networks; between frontal network and middle temporal, orbitofrontal, occipital, cerebellar, frontoparietal, and deep networks; between pre/post-central network and middle temporal, cerebellar, occipital, and deep networks; between middle temporal network and orbitofrontal, frontoparietal, and deep networks; between cerebellar network and orbitofrontal, frontoparietal, and deep networks;

between orbitofrontal network and deep network; and between deep network and frontoparietal, middle temporal, cerebellar, and orbitofrontal networks. In addition, compared with HCs, ESRD patients also exhibited localized increased in FCC among WM functional networks ( $p < 0.05$ , FDR corrected), including the middle temporal network and occipital network, as well as between cerebellar network and occipital network.

### ***Clinical and neuropsychological variables associated with FC and FCC alterations in ESRD patients***

As shown in Supplementary Figure 2, neuropsychological scores in ESRD patients showed significant correlations with the FCC strength of WM networks. Specifically, the greater the cognitive deficits (short-term memory and long-term memory) and mood disorder (depression), the weaker the FCC strength (frontal-middle temporal network, middle temporal-frontoparietal network, corona radiate-deep network, frontal-deep network, and middle temporal-deep network). Similarly, clinical indicators in ESRD patients were significantly correlated with FCC strength of WM network. Specifically, the lower the hematocrit and haemoglobin level, the weaker the FCC strength (corona radiate-middle temporal network, pre/post-central-cerebellar network, and cerebellar-occipital network). The severe the uremia toxins (creatinine) and calcium-phosphorus metabolism disorders (calcium, phosphorus, parathormone), the weaker the FCC strength (corona radiate-middle temporal network, pre/post-central-cerebellar network, cerebellar-occipital network, middle temporal-deep, corona radiate-deep network, and deep-middle temporal network). All significant correlations were identified using Spearman or Pearson correlation analyses ( $p < 0.05$ , FDR-corrected).

Neuropsychological scores in ESRD patients showed significant correlations with the FC strength of WM networks (Supplementary Figure 3). Specifically, the greater the cognitive deficits, the weaker the FC strength (corona radiate-frontal network, corona radiate-deep network, middle temporal-deep network, cerebellar-deep network, frontal-frontoparietal network, and frontal-deep network). Similarly, clinical indicators in ESRD patients were significantly correlated with FC strength of WM network. Specifically, the lower the hematocrit level, the weaker the FC strength (corona radiate-middle temporal network, pre/post-central-cerebellar network, and cerebellar-occipital network). The longer the dialysis vintage and cystatin C level, the weaker the FC strength (middle temporal-orbitofrontal network, corona radiate-middle temporal network, pre/post-central-cerebellar network, coronaradiate-frontoparietal network, pre/post-central-deep network, and corona radiate-deep network). All significant correlations were identified using Spearman or Pearson correlation analyses ( $p < 0.05$ , FDR-corrected).

#### Supplementary References

- 1 Zhang, H. *et al.* Topographical Information-Based High-Order Functional Connectivity and Its Application in Abnormality Detection for Mild Cognitive Impairment. *J Alzheimers Dis* **54**, 1095-1112 (2016).
- 2 Jiang, Y. *et al.* Dysfunctional white-matter networks in medicated and unmedicated benign epilepsy with centrottemporal spikes. *Hum Brain Mapp* **40**, 3113-3124, doi:10.1002/hbm.24584 (2019).

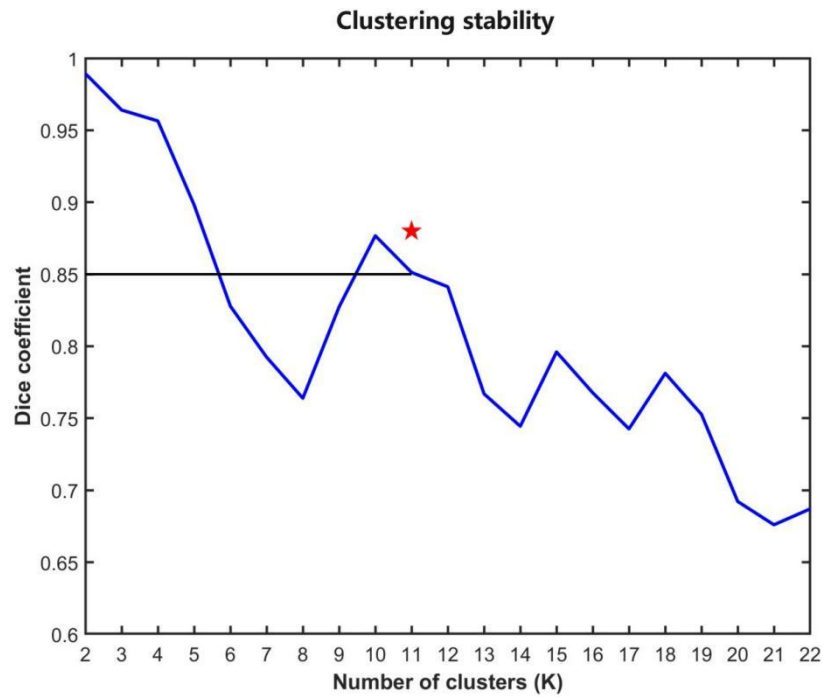

**Supplementary Figure 1. Stability of clustering for different numbers of clusters.** This graph provides the Dice's coefficient for each number of clusters, and shows that the most stable segregation number was eleven.

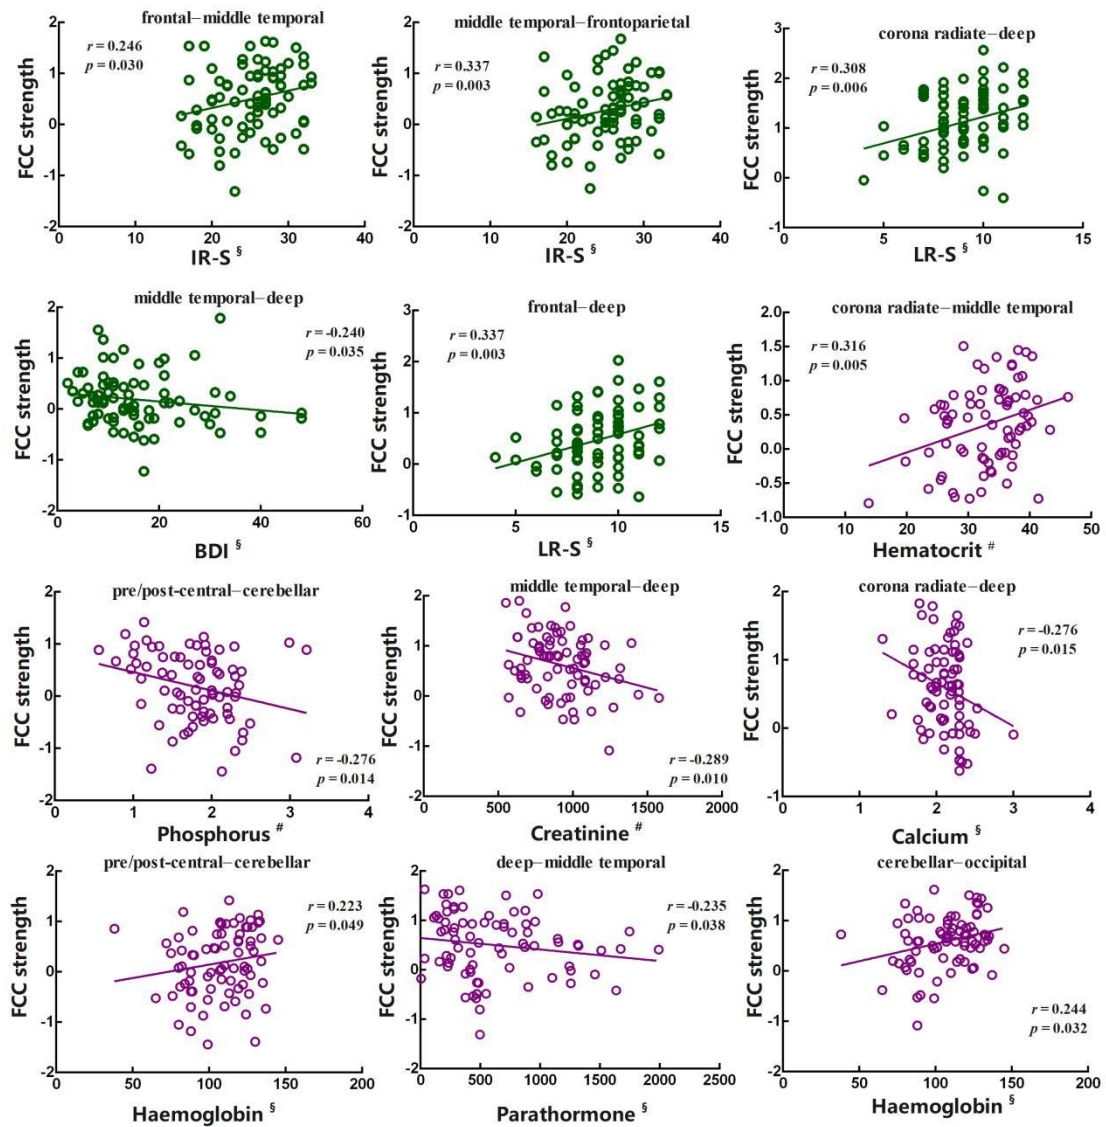

**Supplementary Figure 2. Clinical and neuropsychological variables associated with FCC alterations in ESRD patients.** Green circles denote correlations between the FCC strength of WM functional networks and neuropsychological variables. Purple circles denote correlations between the FCC strength of WM functional networks and clinical indicators. Pearson (#) or Spearman (§) correlation analyses was used to assess relationships between FCC alterations and both clinical indicators and neuropsychological variables. The significance threshold was set to  $p$  values of  $<0.05$  after FDR correction. FCC, functional covariance connectivity; ESRD, end-stage renal disease; IR-S, immediate recall score; LR-S, long-term recall score; BDI,

134 Beck depression inventory.

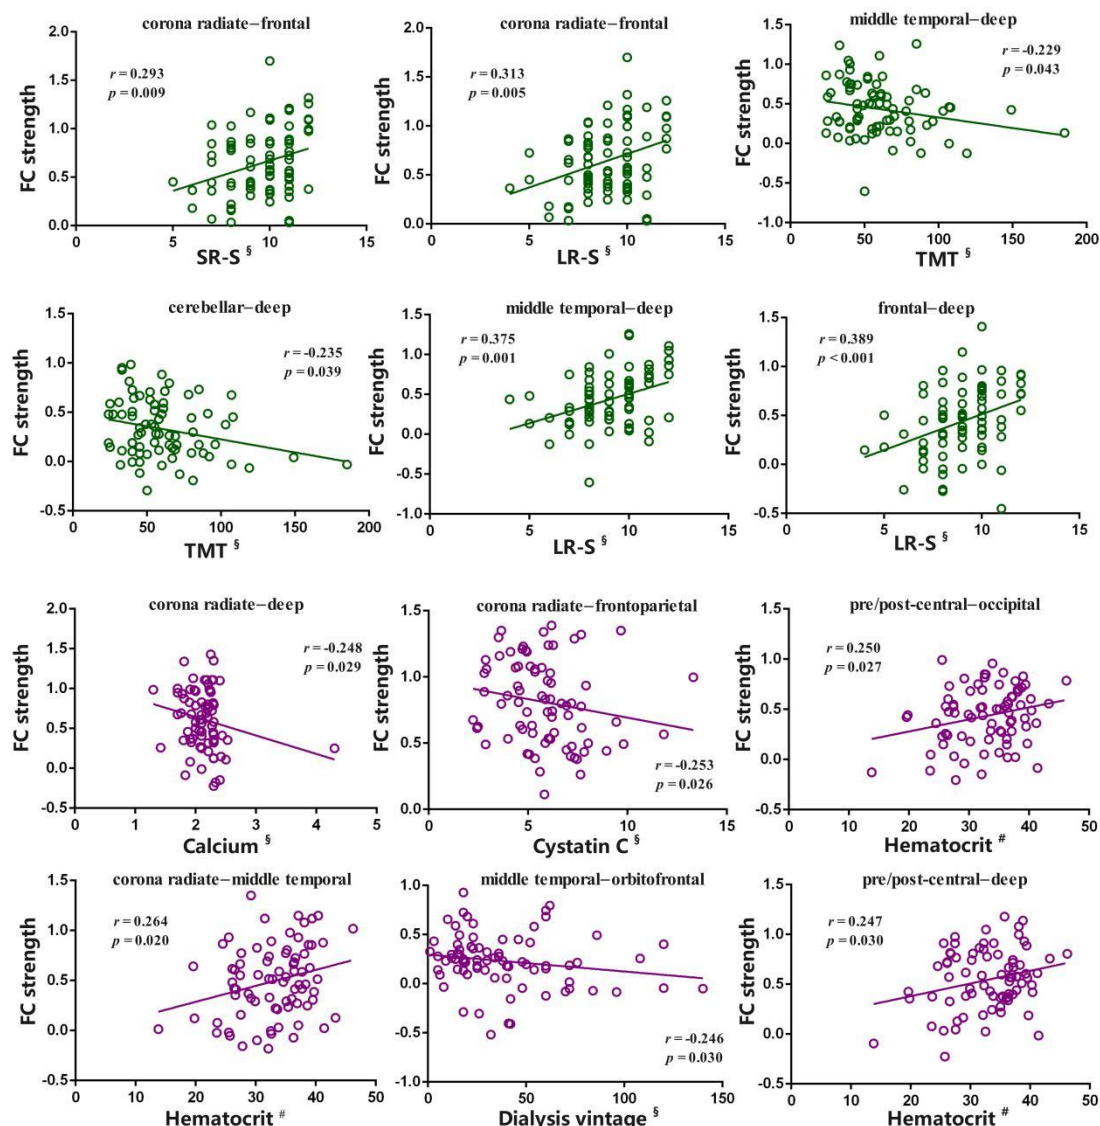

135

136 **Supplementary Figure 3. Clinical and neuropsychological variables associated with FC**

137 **alterations in ESRD patients.** Green circles denote correlations between the FC strength of

138 WM functional networks and neuropsychological variables. Purple circles denote correlations

139 between the FC strength of WM functional networks and clinical indicators. Pearson (#) or

140 Spearman (§) correlation analyses was used to assess relationships between FC alterations

141 and both clinical indicators and neuropsychological variables. The significance threshold was

142 set to  $p$  values of  $<0.05$  after FDR correction. ESRD, end-stage renal disease; SR-S, short-



term recall score; LR-S, long-term recall score; TMT, trail-making test.

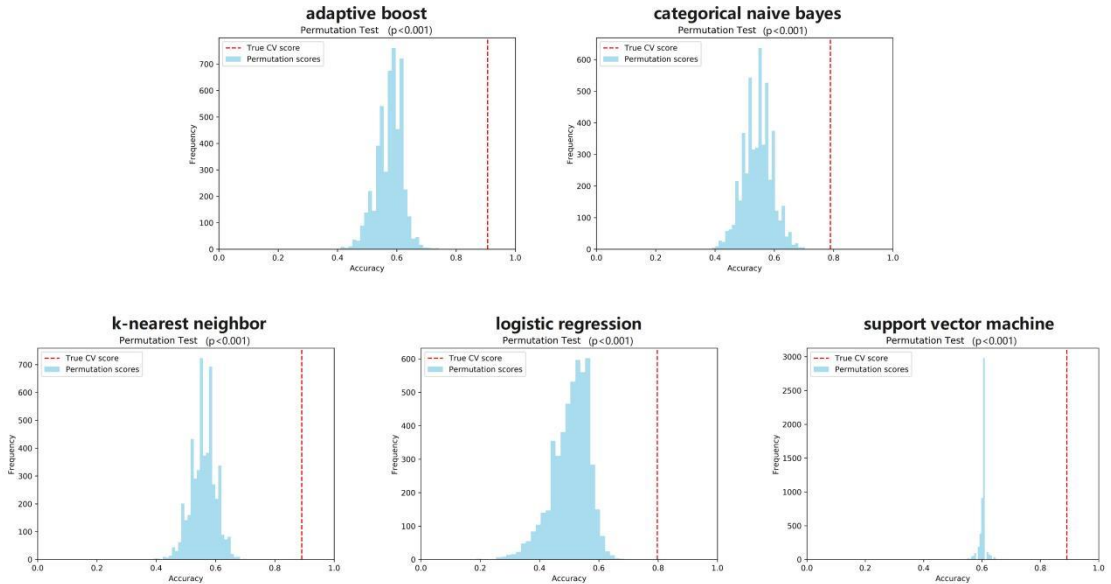

**Supplementary Figure 4. Permutation test results for multiple classification models (repeated 5,000 times).**

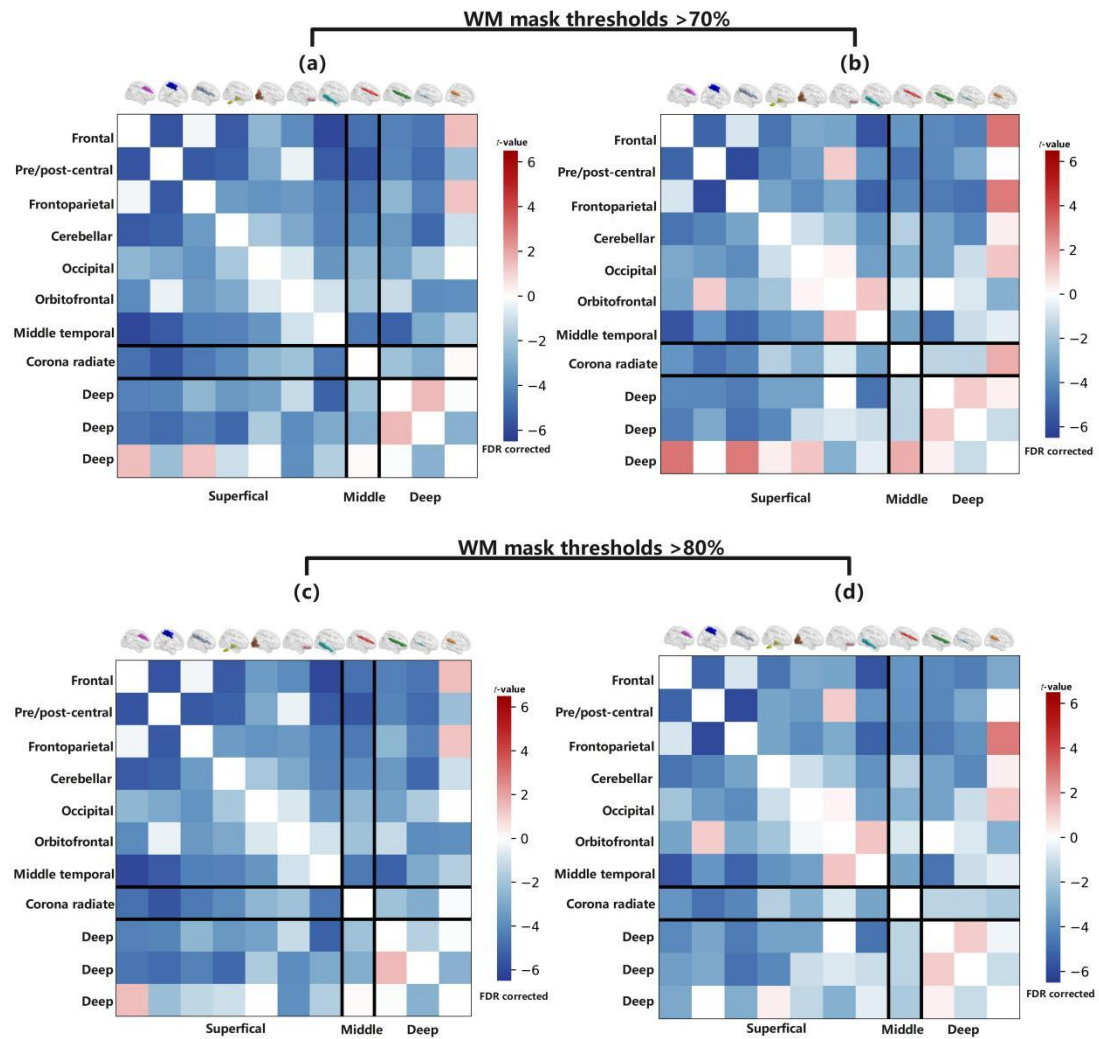

**Supplementary Figure 5. Between-group differences of FC and FCC among WM functional networks in ESRD patients and HCs (threshold > 70% and 80%,  $p < 0.05$ , FDR-corrected).** (a) and (b) respectively show the between-group differences in FC and FCC of 11 WM networks under WM mask threshold > 70%. (c) and (d) respectively show the between-group differences in FC and FCC of 11 WM networks under WM mask threshold > 80%. Both the main results of 70 and 80% group-level masks were consistent with the main results of 60% masks. Thus, the main results were still stable even with stricter masks. ESRD, end-stage renal disease; HCs, healthy controls; WM, white matter; FC, functional connectivity; FCC, functional covariance connectivity.

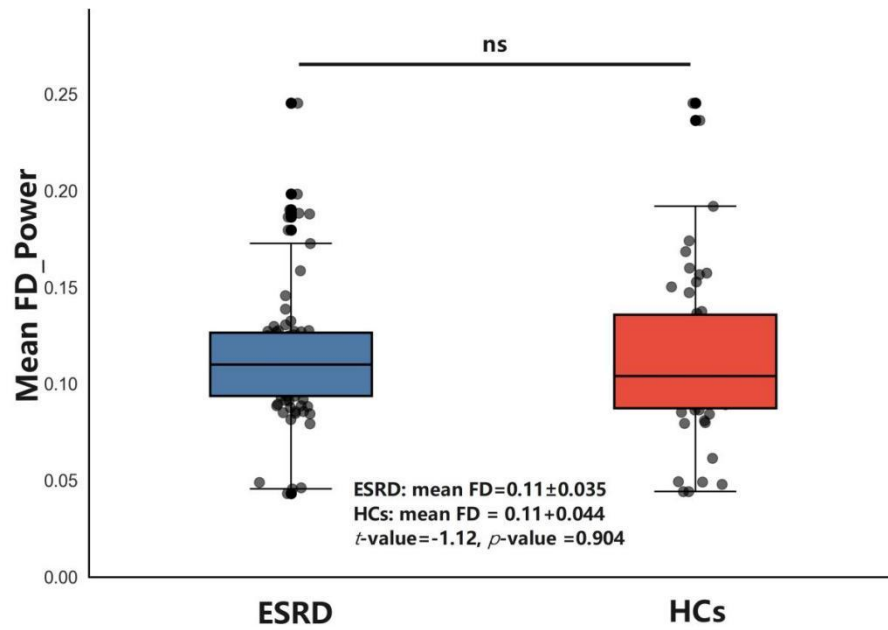

**Supplementary Figure 6. Box plots of the mean framewise displacement (FD) values.** No significant differences in the mean FD values between ESRD patients and HCs.

**Supplementary Table 1. White-matter functional networks**

| <b>White-matter functional network</b> | <b>Network-tract correspondence</b>                      | <b>Layer</b> |
|----------------------------------------|----------------------------------------------------------|--------------|
| Frontal network                        | Frontopontine tract and superior longitudinal fasciculus | Superficial  |
| Pre/post-central network               | Corticospinal tract and cingulum tracts                  | Superficial  |
| Middle temporal network                | Uncinate and middle temporal lobe tracts                 | Superficial  |
| Cerebellar network                     | Inferior corticospinal and posterior cerebellar tracts   | Superficial  |
| Occipital network                      | Forceps major system                                     | Superficial  |
| Orbitofrontal network                  | Forceps minor system and anterior thalamic radiation     | Superficial  |
| Frontoparietal network                 | Cingulum and associated tracts                           | Superficial  |
| Corona radiata network                 | Anterior corona radiata and superior corona radiata      | Middle       |
| Deep network                           | Superior longitudinal fasciculus and uncinate fasciculus | Deep         |
| Deep network                           | Posterior thalamic radiation and internal capsule        | Deep         |
| Deep network                           | Inferior longitudinal fasciculus                         | Deep         |

Note: The network-tract correspondences were estimated based on the overlap between white-matter functional networks and two white-matter tractography atlases provided by Susumu Mori.

182  
183  
184  
185  
186  
187  
188  
189  
190  
191  
192  
193  
194  
195  
196

**Supplementary Table 2. Between-group differences of the FC in WM functional network between ESRD patients and HCs (FDR corrected)**

| WM functional network    | WM functional network    | <i>t</i> -value | <i>p</i> -value |
|--------------------------|--------------------------|-----------------|-----------------|
| Corona radiate network   | Frontal network          | -5.452          | <0.001          |
|                          | Pre/post-central network | -0.904          | 0.368           |
|                          | Deep network             | -5.287          | <0.001          |
|                          | Middle temporal network  | -6.060          | <0.001          |
|                          | Cerebellar network       | -4.351          | <0.001          |
|                          | Occipital network        | -1.614          | 0.109           |
|                          | Orbitofrontal network    | -3.667          | <0.001          |
|                          | Deep network             | -4.268          | <0.001          |
|                          | Deep network             | -4.536          | <0.001          |
|                          | Frontoparietal network   | -2.912          | 0.004           |
|                          | Pre/post-central network | -0.429          | 0.669           |
|                          | Deep network             | -4.186          | <0.001          |
|                          | Middle temporal network  | -5.662          | <0.001          |
|                          | Cerebellar network       | -5.497          | <0.001          |
| Frontal network          | Occipital network        | -2.182          | 0.031           |
|                          | Orbitofrontal network    | -3.027          | 0.003           |
|                          | Deep network             | -5.228          | <0.001          |
|                          | Deep network             | -5.630          | <0.001          |
|                          | Frontoparietal network   | -4.910          | <0.001          |
|                          | Deep network             | -1.179          | 0.241           |
|                          | Middle temporal network  | -4.035          | <0.001          |
|                          | Cerebellar network       | -3.495          | 0.001           |
| Pre/post-central network | Occipital network        | -3.797          | <0.001          |
|                          | Orbitofrontal network    | -0.816          | 0.416           |
|                          | Deep network             | -3.020          | 0.003           |
|                          | Deep network             | -2.130          | 0.035           |
|                          | Frontoparietal network   | -3.954          | <0.001          |
|                          | Middle temporal network  | -4.334          | <0.001          |
|                          | Cerebellar network       | -2.514          | 0.013           |
| Deep network             | Occipital network        | -0.071          | 0.943           |

|                         |                        |        |        |
|-------------------------|------------------------|--------|--------|
|                         | Orbitofrontal network  | -3.171 | 0.002  |
|                         | Deep network           | -3.584 | <0.001 |
|                         | Deep network           | -2.108 | 0.037  |
|                         | Frontoparietal network | 1.670  | 0.098  |
|                         | Cerebellar network     | -0.338 | 0.736  |
|                         | Occipital network      | 1.463  | 0.146  |
| Middle temporal network | Orbitofrontal network  | -2.545 | 0.012  |
|                         | Deep network           | -5.516 | <0.001 |
|                         | Deep network           | -4.774 | <0.001 |
|                         | Frontoparietal network | -4.672 | <0.001 |
|                         | Occipital network      | 1.376  | 0.171  |
| Cerebellar network      | Orbitofrontal network  | -3.808 | <0.001 |
|                         | Deep network           | -3.341 | 0.001  |
|                         | Deep network           | -4.558 | <0.001 |
|                         | Frontoparietal network | -4.242 | <0.001 |
| Occipital network       | Orbitofrontal network  | 0.007  | 0.995  |
|                         | Deep network           | -0.978 | 0.330  |
|                         | Deep network           | 0.109  | 0.914  |
|                         | Frontoparietal network | -2.710 | 0.008  |
| Orbitofrontal network   | Deep network           | -1.954 | 0.053  |
|                         | Deep network           | -2.489 | 0.014  |
|                         | Frontoparietal network | -1.719 | 0.088  |
| Deep network            | Deep network           | -4.031 | <0.001 |
|                         | Frontoparietal network | -5.016 | <0.001 |
| Deep network            | Frontoparietal network | -2.865 | 0.005  |

---

Abbreviations: FC, functional connectivity; ESRD, end-stage renal disease; HCs, healthy controls; WM, white matter; FDR, false discovery rate.

197

198

199

200

201

202

**Supplementary Table 3. Between-group differences of the FCC in WM network between ESRD patients and HCs (FDR corrected)**

| WM functional network    | WM functional network    | <i>t</i> -value | <i>p</i> -value |
|--------------------------|--------------------------|-----------------|-----------------|
| Corona radiate network   | Frontal network          | -3.670          | <0.001          |
|                          | Pre/post-central network | 1.343           | 0.182           |
|                          | Deep network             | -4.775          | <0.001          |
|                          | Middle temporal network  | -5.680          | <0.001          |
|                          | Cerebellar network       | -5.209          | <0.001          |
|                          | Occipital network        | -0.552          | 0.582           |
|                          | Orbitofrontal network    | -3.345          | 0.001           |
|                          | Deep network             | -3.748          | <0.001          |
|                          | Deep network             | -3.158          | 0.002           |
|                          | Frontoparietal network   | -1.040          | 0.300           |
| Frontal network          | Pre/post-central network | 1.134           | 0.259           |
|                          | Deep network             | -4.100          | <0.001          |
|                          | Middle temporal network  | -5.162          | <0.001          |
|                          | Cerebellar network       | -5.999          | <0.001          |
|                          | Occipital network        | 0.010           | 0.992           |
|                          | Orbitofrontal network    | -3.491          | 0.001           |
|                          | Deep network             | -4.144          | <0.001          |
|                          | Deep network             | -4.748          | <0.001          |
|                          | Frontoparietal network   | -2.953          | 0.004           |
|                          | Deep network             | -0.002          | 0.999           |
| Pre/post-central network | Middle temporal network  | -3.215          | 0.002           |
|                          | Cerebellar network       | -2.970          | 0.004           |
|                          | Occipital network        | -2.749          | 0.007           |
|                          | Orbitofrontal network    | 0.239           | 0.811           |
|                          | Deep network             | -2.013          | 0.046           |
|                          | Deep network             | -0.809          | 0.420           |
|                          | Frontoparietal network   | -0.754          | 0.453           |
|                          | Middle temporal network  | -4.089          | <0.001          |
|                          | Cerebellar network       | -4.413          | <0.001          |
|                          | Occipital network        | 0.305           | 0.761           |

|                         |                        |        |        |
|-------------------------|------------------------|--------|--------|
|                         | Orbitofrontal network  | -3.153 | 0.002  |
|                         | Deep network           | -3.208 | 0.002  |
|                         | Deep network           | -1.393 | 0.166  |
|                         | Frontoparietal network | 1.200  | 0.233  |
|                         | Cerebellar network     | -0.870 | 0.386  |
|                         | Occipital network      | 2.998  | 0.003  |
| Middle temporal network | Orbitofrontal network  | -3.089 | 0.002  |
|                         | Deep network           | -4.767 | <0.001 |
|                         | Deep network           | -3.672 | <0.001 |
|                         | Frontoparietal network | -4.370 | <0.001 |
|                         | Occipital network      | 2.888  | 0.005  |
| Cerebellar network      | Orbitofrontal network  | -4.096 | <0.001 |
|                         | Deep network           | -3.038 | 0.003  |
|                         | Deep network           | -4.133 | <0.001 |
|                         | Frontoparietal network | -4.724 | <0.001 |
| Occipital network       | Orbitofrontal network  | 1.291  | 0.199  |
|                         | Deep network           | 0.411  | 0.682  |
|                         | Deep network           | 1.806  | 0.073  |
|                         | Frontoparietal network | -1.151 | 0.252  |
| Orbitofrontal network   | Deep network           | -1.071 | 0.286  |
|                         | Deep network           | -2.727 | 0.007  |
|                         | Frontoparietal network | -1.048 | 0.297  |
| Deep network            | Deep network           | -1.640 | 0.104  |
|                         | Frontoparietal network | -4.080 | <0.001 |
| Deep network            | Frontoparietal network | -1.421 | 0.158  |

---

Abbreviations: FCC, functional covariance connectivity; ESRD, end-stage renal disease; HCs, healthy controls; WM, white matter; FDR, false discovery rate.

203

204

205

206

207

208



**Supplementary Table 4. Between-group differences in WM functional network interactions between ESRD patients and HCs (FDR corrected)**

| GC pattern | Layer                     | WM functional network                              | <i>t</i> -value                      | <i>p</i> -value |
|------------|---------------------------|----------------------------------------------------|--------------------------------------|-----------------|
| Excitatory | Middle → Superficial      | Corona radiate network → Frontal network           | -2.389                               | 0.018           |
|            |                           | Corona radiate network → Pre/post-central network  | -3.404                               | 0.001           |
|            |                           | Corona radiate network → Cerebellar network        | -3.469                               | 0.001           |
|            | Superficial → Deep        | Middle temporal network → Deep network             | -3.076                               | 0.003           |
|            | Superficial → Middle      | Middle temporal network → Corona radiate network   | -2.030                               | 0.044           |
|            |                           | Middle temporal network → Cerebellar network       | -3.196                               | 0.002           |
|            | Superficial → Superficial | Middle temporal network → Occipital network        | -2.835                               | 0.005           |
|            |                           | Middle temporal network → Orbitofrontal network    | -1.985                               | 0.049           |
|            |                           | Middle temporal network → Pre/post-central network | -3.716                               | <0.001          |
|            | Deep → Superficial        | Frontoparietal network → Occipital network         | -2.140                               | 0.034           |
|            |                           | Deep network → Occipital network                   | -2.119                               | 0.036           |
|            |                           | Pre/post-central network → Middle temporal network | 2.283                                | 0.024           |
|            | Superficial → Superficial | Orbitofrontal network → Frontal network            | 2.136                                | 0.035           |
|            |                           | Orbitofrontal network → Pre/post-central network   | 2.171                                | 0.032           |
| Inhibitory |                           | Cerebellar network → Middle temporal network       | 2.017                                | 0.046           |
|            |                           | Superficial → Deep                                 | Orbitofrontal network → Deep network | 3.302           |
|            | Superficial → Middle      | Pre/post-central network → Corona radiate network  | 2.127                                | 0.035           |

Abbreviations: GC, Granger causality; ESRD, end-stage renal disease; HCs, healthy controls; WM, white matter; FDR, false discovery rate.

**Supplementary Table 5. The In/Out strength in tri-layer WM functional networks between ESRD patients and HCs (FDR corrected)**

| In/Out strength | HCs        | ESRD       | <i>t</i> -value | <i>p</i> -value |
|-----------------|------------|------------|-----------------|-----------------|
| Superficial     |            |            |                 |                 |
| In strength     | 2.71(2.01) | 1.97(1.45) | -2.490          | 0.014*          |
| Out strength    | 2.73(2.00) | 1.97(1.48) | -2.557          | 0.012*          |
| Middle          |            |            |                 |                 |
| In strength     | 2.89(1.72) | 1.35(1.10) | -2.385          | 0.028*          |
| Out strength    | 4.09(2.16) | 2.66(1.44) | -1.743          | 0.098           |
| Deep            |            |            |                 |                 |
| In strength     | 2.62(1.88) | 2.15(1.70) | -1.985          | 0.049*          |
| Out strength    | 2.27(1.48) | 1.84(1.58) | -1.014          | 0.315           |

Note.—data are mean (standard deviation). Abbreviations: ESRD, end-stage renal disease; HCs, healthy controls; WM, white matter; FDR, false discovery rate. \* Indicates a statistically significant difference after FDR corrected.

211

212

213

214

215

216

217

218

219

220

221

222

223

224

225

226

**Supplementary Table 6. The classification results based on WM functional network metrics (LOOCV cross-validation)**

| Classifier                                                                             | Accuracy | Specificity | Sensitivity | AUC          |
|----------------------------------------------------------------------------------------|----------|-------------|-------------|--------------|
| K-Nearest Neighbor                                                                     | 89.06%   | 90.00%      | 88.46%      | 0.940        |
| Logistic Regression                                                                    | 79.69%   | 74.00%      | 83.33%      | 0.858        |
| Support Vector Machine                                                                 | 89.06%   | 80.00%      | 94.87%      | 0.919        |
| Adaptive Boost                                                                         | 90.62%   | 82.00%      | 96.15%      | 0.916        |
| Random Forest                                                                          | 95.31%   | 88.00%      | 99.00%      | <b>0.982</b> |
| Categorical Naive Bayes                                                                | 78.91%   | 74.00%      | 82.05%      | 0.832        |
| Abbreviations: LOOCV = leave-one-out; CI = confidence interval; AUC = Area under curve |          |             |             |              |

227

228

229

230
